# Supplementary material for: Mast Cells Interact with Endothelial Cells to Accelerate In Vitro Angiogenesis
Source: Preprints.org preprint supplement (doi:10.20944/preprints201710.0190.v1), 2017-10-31
Supplement: Supplementary file 1 [file supplementary]

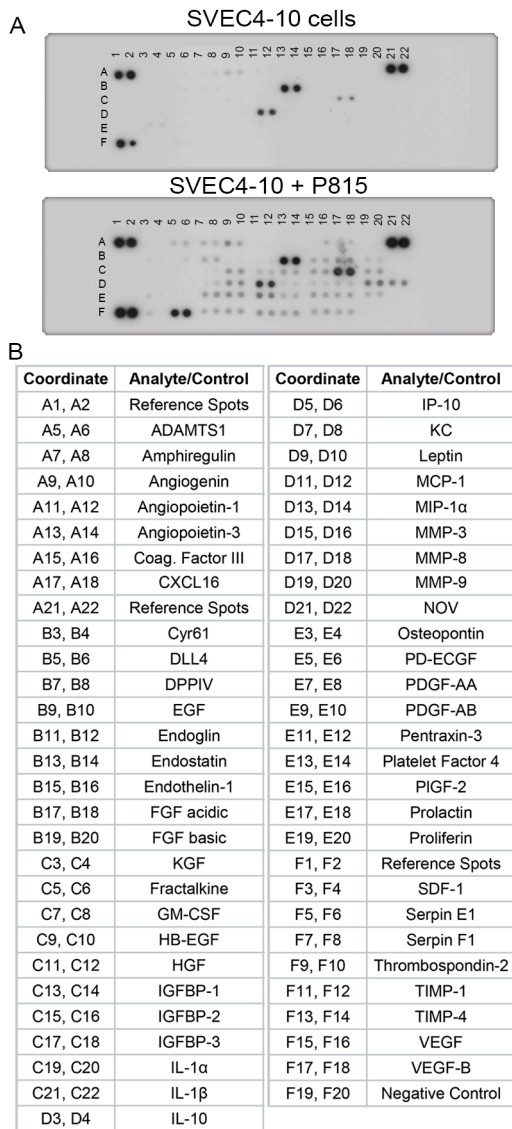

**Figure S1.** Differential release of angiogenic factors by SVEC4-10 cells in the presence or absence of mast cells. The SVEC4-10 cells were cultured for 5 hours at 37 °C on Geltrex® in the presence or absence of P815 mast cells. Culture supernatants were used to analyze the protein expression of pro- and anti-angiogenic factors using the Proteome Profiler™ Mouse Angiogenesis Array Kit. **(A)** Array membrane images are shown. **(B)** Table giving the mouse angiogenesis array coordinates with a description and location of each angiogenic factor in the membrane array.
